# Supplementary material for: The impact of physical activity and an additional behavioural risk factor on cardiovascular disease, cancer and all-cause mortality: a systematic review
Source: Springer Nature journal article supplement (doi:10.1186/s12889-019-7030-8), 2019-07-08
Supplement: MOESM1 [file 16907454]

## **APPENDIX 1**

### **Physical activity + risk factor(s) and incidence and mortality of non-communicable diseases**

#### **Data extraction form**

**Name of reviewer:**

**Date of extraction:**

#### **Section 1**

**Name of paper:**

**Year of paper:**

#### **Section 2**

**Inclusion (Write yes if conforms to all criteria above)**

**Confirm eligibility:**

**Comments:**

#### **Section 3 study methods**

**Type of study:**

**Total study duration:**

**Method used to cluster/group lifestyle behaviours:**

#### **Section 4 participants**

**Number:**

**Setting** (community/hospital/both):

**Outcome:**

**Mean Age:**

**Gender breakdown:**

**Country:**

**Section 5 interventions**

**Intervention 1**

**Title of intervention:**

**Details of intervention:**

**Follow-up linked to medical records (y/n):**

**Years of follow-up:**

**Comments:**

**Section 6 outcomes**

For each outcome of interest

**Outcome Title 1: All-cause Mortality**

**Length of follow up:**

**Time point collected:**

**Time point reported:**

**Outcome definition:**

**Outcome Title 2: NCD**

**Length of follow up:**

**Time point collected:**

**Time point reported:**

**Outcome definition:**

## Section 7 results

### Outcome Title 1 *All-cause Mortality*

Comments

|                                             |  |  |  |
|---------------------------------------------|--|--|--|
| Sample size for this outcome                |  |  |  |
| Number of missing participants at follow-up |  |  |  |
| Events:                                     |  |  |  |
| Specify time units (eg days)                |  |  |  |
| Any other data                              |  |  |  |
| Any comments on measurement of this outcome |  |  |  |

### Outcome Title 2: *NCD's*

Comments

|                                             |  |  |  |
|---------------------------------------------|--|--|--|
| Sample size for this outcome                |  |  |  |
| Number of missing participants at follow-up |  |  |  |
| Events:                                     |  |  |  |
| Specify time units (eg days)                |  |  |  |
| Any other data                              |  |  |  |
| Any comments on measurement of this outcome |  |  |  |

## Section 8

**Funding source:**

**Key conclusions of authors:**

**Other comments:**

**What do we need to ask the authors?:**

**Also need to add in**

**Statistical methods (adjustment for baseline values, dilution regression applied, handling of missing data?)**

**Quality of exposure measures (reported validity, face validity?)**

**Quality of outcome measures**

**Type of exposure measure (continuous, binary)**
